# Supplementary material for: Providing researchers with online access to NHLBI biospecimen collections: The results of the first six years of the NHLBI BioLINCC program
Source: PLoS One. 2017 Jun 14;12(6):e0178141. doi: 10.1371/journal.pone.0178141 (PMC5470669; doi:10.1371/journal.pone.0178141)
Supplement: S2 Table — (XLSX) [file pone.0178141.s002.xlsx]

## Sheet: Data - Years 1 - 6 Requests
Website Request #	Request Type	Request Status	Online Year	Successful Search?	Date Created	Date of Successful Search	Date Approved	Date Specimens Shipped	Time (days): Date Created to Date Specimens Shipped	Time (days): Date Created to Date of Successful Search	Time (days): Date of Successful Search to Date of Approval	Time (days): Date Approved to Date Specimens Shipped	Any Specimens Aliquoted?	Specimen #	Bronchial Lavage	Buccal Cells	Buccal Swab	Buffy Coat	Cells	Cord Blood	Cord Blood Unit	Dna	Dried Buffy Coat	Lymphocytes	Nucleated Cells	Packed Red Blood Cells Partially Suspended	Peripheral Bl Mono Cells	Plasma	Plasma Or Serum	Plasma Product	Saliva Swab	Serum	Stem Cells	Throat Swab	Tissue	Unknown	Urine	Whole Blood	Collection Acronym(s)	Website?	Original Study PI?	Open/Proprietary	Funding available at time of request	Funding Source	PI Status (Years In Scientific Research)	RFA	Research Type	Publication Count	Highest Journal Impact Factor
133	Specimen and Data Request	Fulfilled	1	Successful Search	2010-01-14	2010-01-14	2010-06-09	2010-06-30	167	0	146	21	No	100														100											PEACE	Yes	No	open	Yes	NIH Extramural + Type of award: R, T, K, U or Other	10+ years	No	Hypothesis Testing	0
165	Specimen Request	Fulfilled	1	Successful Search	2010-01-07	2010-02-04	2010-06-02	2010-08-25	230	28	118	84	No	8000																								8000	REDS-GSR/GLPR	Yes	No	open	Yes	Institutional/Departmental	10+ years	No	Hypothesis Testing	0
166	Specimen and Data Request	Fulfilled	1	Successful Search	2009-12-21	2010-02-04	2010-02-26	2010-04-07	107	45	22	40	Yes	110																		110							MSH	Yes	Yes	open	Yes	NIH Extramural + Type of award: R, T, K, U or Other	10+ years	No	Hypothesis Testing	0
177	Specimen and Data Request	Closed - materials not available	1	No Search	2010-02-09																																		generic	Yes	No	open				No		0
200	Specimen and Data Request	Fulfilled	1	Successful Search	2010-01-29	2010-03-02	2010-06-02	2010-07-12	164	32	92	40	Yes	1332								1332																	ACCESS	Yes	No	open	Yes	NIH Extramural + Type of award: R, T, K, U or Other	10+ years	No	Hypothesis Testing	0
206	Specimen and Data Request	Closed - materials not available	1	Unsuccessful Search	2010-03-10																																		generic	Yes	No	open				No		0
240	Specimen Request	Fulfilled	1	Successful Search	2010-03-30	2010-04-05	2010-04-05	2010-04-15	16	6	0	10	No	1																		1							HEIRS	Yes	Yes	open	Yes	NIH Extramural + Type of award: R, T, K, U or Other	0-5 years	No	Hypothesis Testing	0
243	Specimen Request	Closed - inactivity	1	Unsuccessful Search	2010-04-05																																		generic	Yes	Yes	open				No		0
253	Specimen Request	Closed - materials not available	1	No Search	2010-04-08																																		generic	Yes	No	open				No		0
263	Specimen and Data Request	Fulfilled	1	Successful Search	2010-04-13	2010-04-14	2010-06-02	2010-08-10	119	1	49	69	Yes	1492														1492											ARDSNet-FACTT	Yes	No	open	Yes	NIH Extramural + Type of award: R, T, K, U or Other	10+ years	No	Hypothesis Testing	1	5
271	Specimen Request	Closed - materials not available	1	No Search	2010-04-20																																		generic	Yes	No	open				No		0
282	Specimen and Data Request	Closed - materials not available	1	No Search	2010-04-27																																		generic	Yes	No	open				No		0
293	Specimen and Data Request	Closed - inactivity	1	Successful Search	2010-05-03	2010-05-05				2																													CBB	Yes	Yes	open				No		0
303	Specimen Request	Closed - materials not available	1	No Search	2010-05-13																																		generic	Yes	No	open				No		0
309	Specimen and Data Request	Closed - materials not available	1	No Search	2010-05-23																																		generic	Yes	No	open				No		0
318	Specimen Request	Closed - cancelled by user - other reason / NOS	1	No Search	2010-05-28																																		NGHS	Yes	No	open				No		0
327	Specimen Request	Closed - inactivity	1	No Search	2010-06-02																																		REDS-RADAR; REDS-SR	Yes	No	open				No		0
328	Specimen and Data Request	Fulfilled	1	Successful Search	2010-04-29	2010-06-04	2010-06-09	2011-05-03	369	36	5	328	Yes	499														401				98							MHCS	Yes	No	open	Yes	NIH Intramural Research	5-10 years	No	Hypothesis Testing	1	9
333	Specimen and Data Request	Closed - inactivity	1	No Search	2010-06-17																																		generic	Yes	No	open				No		0
334	Specimen Request	Fulfilled	1	Successful Search	2009-12-22	2010-06-21	2010-08-17	2010-09-20	272	181	57	34	Yes	301														301											REDS-SR	Yes	No	open	Yes	Non-NIH Federal Funding	10+ years	No	Assay Validation	0
346	Specimen Request	Fulfilled	1	Successful Search	2010-05-10	2010-06-25	2010-07-07	2010-07-19	70	46	12	12	No	13							13																		CBB	Yes	No	open	Yes	NIH Intramural Research	10+ years	No	Pilot Study	0
390	Specimen and Data Request	Closed - request requirements	1	No Search	2010-07-23																																		ACCESS	Yes	No	open				No		0
395	Specimen Request	Fulfilled	1	Successful Search	2010-07-20	2010-08-03	2010-12-02	2011-01-11	175	14	121	40	Yes	1346														1346											ARDSNet-FACTT	Yes	No	open	Yes	NIH Extramural + Type of award: R, T, K, U or Other	0-5 years	No	Hypothesis Testing	1	5
403	Specimen and Data Request	Fulfilled	1	Successful Search	2010-02-14	2010-08-10	2010-11-24	2010-12-15	304	177	106	21	Yes	192														110	80			2							TSS	Yes	No	open	Yes	Institutional/Departmental	10+ years	No	Hypothesis Testing	0
480	Specimen Request	Fulfilled	1	Successful Search	2010-09-15	2010-10-04	2010-10-13	2010-10-20	35	19	9	7	No	50							50																		CBB	Yes	No	open	Yes	NIH Intramural Research	0-5 years	No	Assay Validation	0
504	Specimen Request	Fulfilled	2	Successful Search	2010-10-05	2010-10-18	2010-11-17	2010-12-20	76	13	30	33	No	16							16																		CBB	Yes	No	open	Yes	Institutional/Departmental	10+ years	No	Hypothesis Testing	1	28
514	Specimen and Data Request	Closed - cancelled by user - other reason / NOS	2	Unsuccessful Search	2010-10-26																																		PEACE	Yes	No	open				No		0
623	Specimen Request	Fulfilled	2	Successful Search	2011-01-28	2011-02-18	2011-09-27	2012-01-24	361	21	221	119	Yes	1157								1157																	HEIRS	Yes	No	open	No	Non-NIH Federal Funding	10+ years	No	Hypothesis Testing	0
631	Specimen and Data Request	Closed - request not funded	2	Successful Search	2011-02-08	2011-02-10				2																													ARDSNet-ALVEOLI	Yes	No	open	No	NIH Extramural + Type of award: R, T, K, U or Other	10+ years	Yes		0
643	Specimen and Data Request	Closed - materials not available	2	Unsuccessful Search	2011-02-14																																		MSH	Yes	No	open	Yes	RFA-HL-12-004		Yes		0
644	Specimen Request	Closed - materials not available	2	Unsuccessful Search	2011-02-15																																		REDS-GSR/GLPR	Yes	No	open	Yes	NIH Extramural + Type of award: R, T, K, U or Other		No		0
645	Specimen and Data Request	Fulfilled	2	Successful Search	2011-02-15	2011-10-25	2011-12-21	2012-03-16	395	252	57	86	Yes	293								293																	HEIRS	Yes	No	open	Yes	Funding Outside of the United States	10+ years	No	Hypothesis Testing	1	10
647	Specimen Request	Closed - materials not available	2	Unsuccessful Search	2011-02-17																																		generic	Yes	No	open	Yes	NIH Extramural + Type of award: R, T, K, U or Other		Yes		0
676	Specimen and Data Request	Fulfilled	2	Successful Search	2011-03-07	2011-04-15	2012-05-07	2012-08-22	534	39	388	107	Yes	3432														3432											DASH-Sodium; PEACE	Yes	No	open	No	RFA-HL-12-004	10+ years	Yes	Hypothesis Testing	10	13
682	Specimen and Data Request	Closed - denied	2	Successful Search	2011-01-06	2011-03-11				64																													HHP	Yes	No	open	Yes	NIH Extramural + Type of award: R, T, K, U or Other	5-10 years	No		0
691	Specimen Request	Closed - request not funded	2	Successful Search	2011-03-19	2011-04-08				20																													PREMIER; REDS-GSR/GLPR	Yes	No	open	No	RFA-HL-12-004		Yes		0
693	Specimen and Data Request	Closed - request not funded	2	Successful Search	2011-03-21	2011-04-14				24																													HHP	Yes	No	open	No	NIH Extramural + Type of award: R, T, K, U or Other	10+ years	Yes		0
697	Specimen Request	Fulfilled	2	Successful Search	2011-02-08	2011-03-22	2012-03-12	2012-05-02	449	42	356	51	No	480						480																			CBB	Yes	No	open	No	RFA-HL-12-004	10+ years	Yes	Assay Validation	0
698	Specimen and Data Request	Closed - inactivity	2	Unsuccessful Search	2011-03-22																																		NGHS	Yes	No	open		RFA-HL-12-004		Yes		0
699	Specimen and Data Request	Closed - request not funded	2	Successful Search	2011-03-22	2011-04-06				15																													ARDSNet-LASRS; ARDSNet-ALVEOLI	Yes	No	open	No	RFA-HL-12-004	5-10 years	Yes		0
701	Specimen Request	Closed - request requirements	2	Successful Search	2011-02-04	2011-03-24				48																													HHP	Yes	No	open	Yes	NIH Extramural + Type of award: R, T, K, U or Other		No		0
704	Specimen and Data Request	Closed - cancelled by user - other reason / NOS	2	Unsuccessful Search	2011-03-25																																		ARDSNet-ARMA/KARMA/LARMA; ARDSNet-LASRS; ARDSNet-ALVEOLI; ARDSNet-FACTT	Yes	No	open	Yes	NIH Extramural + Type of award: R, T, K, U or Other		Yes		0
706	Specimen and Data Request	Fulfilled	2	Successful Search	2011-03-25	2011-04-12	2012-04-12	2012-05-23	425	18	366	41	Yes	888														888											ARDSNet-FACTT	Yes	No	open	No	RFA-HL-12-004	10+ years	Yes	Hypothesis Testing	6	8
712	Specimen Request	Closed - request not funded	2	Successful Search	2011-03-28	2011-04-28				31																													ARDSNet-ARMA/KARMA/LARMA; ARDSNet-FACTT; REDS-GSR/GLPR	Yes	No	open	No	RFA-HL-12-004	10+ years	Yes		0
718	Specimen and Data Request	Fulfilled	2	Successful Search	2011-04-01	2011-04-12	2012-04-30	2012-08-08	495	11	384	100	Yes	1574														1574											ARDSNet-FACTT	Yes	No	open	No	RFA-HL-12-004	5-10 years	Yes	Hypothesis Testing	8	11
720	Specimen Request	Closed - request not funded	2	Successful Search	2011-04-03	2011-04-15				12																													REDS-GSR/GLPR	Yes	No	open	No	RFA-HL-12-004	10+ years	Yes		0
721	Specimen Request	Closed - request not funded	2	Successful Search	2011-04-03	2011-04-26				23																													MHCS	Yes	No	open	No	RFA-HL-12-004	10+ years	Yes		0
725	Specimen and Data Request	Closed - request not funded	2	Successful Search	2011-04-05	2011-04-26				21																													ARDSNet-LASRS	Yes	No	open	No	RFA-HL-12-004	10+ years	Yes		0
730	Specimen Request	Fulfilled	2	Successful Search	2011-04-07	2011-04-26	2012-03-13	2012-05-30	419	19	322	78	Yes	1777																		1777							TTVS	Yes	No	open	No	RFA-HL-12-004	5-10 years	Yes	Hypothesis Testing	2	3
732	Specimen and Data Request	Fulfilled	2	Successful Search	2011-04-08	2011-04-21	2012-03-21	2012-07-17	466	13	335	118	Yes	1917																		1917							HHP	Yes	No	open	No	RFA-HL-12-004	10+ years	Yes	Hypothesis Testing	0
734	Specimen and Data Request	Closed - materials not available	2	Unsuccessful Search	2011-04-08																																		CSSCD	Yes	No	open		RFA-HL-12-004		Yes		0
735	Specimen and Data Request	Closed - materials not available	2	Unsuccessful Search	2011-04-08																																		DASH	Yes	No	open		RFA-HL-12-004		Yes		0
737	Specimen and Data Request	Fulfilled	2	Successful Search	2011-04-08	2011-04-26	2012-04-03	2012-06-08	427	18	343	66	Yes	348																		348							HEIRS	Yes	No	open	No	RFA-HL-12-004	10+ years	Yes	Hypothesis Testing	2	2
742	Specimen and Data Request	Closed - cancelled by user - other reason / NOS	2	Unsuccessful Search	2011-04-11																																		CSSCD	Yes	No	open		RFA-HL-12-004		Yes		0
747	Specimen Request	Fulfilled	1	Successful Search	2010-09-26	2011-04-12	2011-05-31	2011-07-05	282	198	49	35	Yes	339																		339							TTVS	Yes	No	open	No	NIH Extramural + Type of award: R, T, K, U or Other	10+ years	No	Pilot Study	1	4
749	Specimen and Data Request	Closed - request not funded	2	Successful Search	2011-04-13	2011-04-21				8																													HHP	Yes	No	open	No	RFA-HL-12-004	10+ years	Yes		0
752	Specimen and Data Request	Closed - request not funded	2	Successful Search	2011-04-13	2011-04-25				12																													ARDSNet-ARMA/KARMA/LARMA	Yes	No	open	No	RFA-HL-12-004	10+ years	Yes		0
758	Specimen Request	Fulfilled	2	Successful Search	2011-04-18	2011-07-21	2012-04-17	2012-06-20	429	94	271	64	Yes	200																		200							MHCS	Yes	No	open	Yes	NIH Extramural + Type of award: R, T, K, U or Other	5-10 years	No	Hypothesis Generating	1
759	Specimen Request	Fulfilled	2	Successful Search	2011-04-18	2011-04-27	2012-03-13	2012-04-24	372	9	321	42	No	1000														500										500	REDS-GSR/GLPR	Yes	No	open	No	RFA-HL-12-004	10+ years	Yes	Hypothesis Testing	0
762	Specimen Request	Closed - request not funded	2	Successful Search	2011-04-19	2011-04-21				2																													TSS	Yes	No	open	No	NIH Extramural + Type of award: R, T, K, U or Other	5-10 years	Yes		0
765	Specimen Request	Fulfilled	1	Successful Search	2011-04-05	2011-04-20	2011-07-11	2011-09-12	160	15	82	63	No	48								24					24												MHCS	Yes	No	open	Yes	NIH Intramural Research	10+ years	No	Hypothesis Testing	0
769	Specimen Request	Fulfilled	2	Successful Search	2011-04-21	2011-04-29	2012-03-13	2012-04-23	368	8	319	41	No	40							40																		CBB	Yes	No	open	No	RFA-HL-12-004	10+ years	Yes	Hypothesis Testing	1	3
772	Specimen and Data Request	Fulfilled	2	Successful Search	2011-04-22	2011-05-02	2012-04-12	2012-10-17	544	10	346	188	Yes	3606														3606											PEACE	Yes	No	open	No	RFA-HL-12-004	10+ years	Yes	Hypothesis Testing	1
780	Specimen and Data Request	Closed - request not funded	2	Successful Search	2011-04-28	2011-04-30				2																													ARDSNet-ALVEOLI; ARDSNet-FACTT	Yes	No	open	No	RFA-HL-12-004	10+ years	Yes		0
795	Specimen and Data Request	Closed - request not funded	2	Successful Search	2011-05-13	2011-10-21				161																													ACCESS; ARDSNet-LASRS	Yes	No	open	No	Institutional/Departmental	10+ years	No		0
796	Specimen and Data Request	Fulfilled	2	Successful Search	2010-10-25	2011-05-13	2011-07-01	2011-11-01	372	200	49	123	Yes	1144																		1144							TRAP	Yes	No	open	Yes	NIH Extramural + Type of award: R, T, K, U or Other	10+ years	No	Hypothesis Testing	1	9
797	Specimen Request	Fulfilled	2	Successful Search	2011-05-17	2011-07-27	2012-08-17	2012-11-21	554	71	387	96	Yes	754								754																	MHCS	Yes	No	open	Yes	Private Foundation	10+ years	No	Hypothesis Testing	0
808	Specimen and Data Request	Closed - request not funded	2	Successful Search	2011-05-28	2011-06-08				11																													ARDSNet-LASRS	Yes	No	open	No	Pending	10+ years	No		0
821	Specimen Request	Fulfilled	2	Successful Search	2011-05-10	2011-06-06	2011-06-09	2011-06-15	36	27	3	6	No	50							50																		CBB	Yes	No	open	Yes	NIH Intramural Research	10+ years	No	Hypothesis Testing	0
830	Specimen Request	Fulfilled	2	Successful Search	2011-05-24	2011-06-08	2011-08-12	2011-10-18	147	15	65	67	No	10							10																		CBB	Yes	No	open	Yes	NIH Intramural Research	10+ years	No	Hypothesis Testing	0
862	Specimen and Data Request	Fulfilled	2	Successful Search	2011-05-22	2011-06-27	2011-09-02	2011-10-03	134	36	67	31	No	400														400											ACCESS	Yes	No	open	Yes	Institutional/Departmental	0-5 years	No	Hypothesis Testing	0
879	Specimen and Data Request	Fulfilled	2	Successful Search	2011-07-12	2011-07-29	2011-08-04	2011-09-19	69	17	6	46	No	1315																							1315		OMNI Heart	Yes	No	open	Yes	Funding Outside of the United States	0-5 years	No	Hypothesis Generating	0
883	Specimen and Data Request	Fulfilled	2	Successful Search	2011-07-13	2011-08-02	2012-05-10	2012-07-30	383	20	282	81	No	353																		353							P2C2	Yes	No	open	No	RFA-HL-12-004	10+ years	Yes	Hypothesis Testing	0
941	Specimen and Data Request	Fulfilled	2	Successful Search	2011-08-22	2011-12-08	2011-12-21	2012-02-01	163	108	13	42	No	870														870											VATS	Yes	No	open	Yes	NIH Extramural + Type of award: R, T, K, U or Other	5-10 years	No	Hypothesis Testing	0
946	Specimen and Data Request	Fulfilled	2	Successful Search	2011-08-23	2011-09-12	2011-11-03	2011-12-07	106	20	52	34	No	1544												1544													REDS II-LAPS	Yes	No	open	No	NIH Extramural + Type of award: R, T, K, U or Other	10+ years	No	Hypothesis Generating	0
947	Specimen and Data Request	Fulfilled	2	Successful Search	2011-08-23	2011-10-06	2012-01-05	2012-02-27	188	44	91	53	Yes	129												129													REDS II-RISE	Yes	No	open	No	NIH Extramural + Type of award: R, T, K, U or Other	10+ years	No	Hypothesis Testing	1
950	Specimen Request	Closed - request not funded	2	Successful Search	2011-08-25	2012-02-13				172																													CBB	Yes	No	open	No	RFA-HL-12-004	10+ years	Yes		0
952	Specimen and Data Request	Closed - request requirements	2	Successful Search	2011-08-25	2011-11-23				90																													DASH-Sodium	Yes	No	open	No	RFA-HL-12-004		Yes		0
955	Specimen and Data Request	Fulfilled	2	Successful Search	2011-08-26	2011-09-08	2013-10-17	2013-11-12	809	13	770	26	Yes	7037																		4426					2611		DASH; DASH-Sodium; PREMIER	Yes	No	open	No	NIH Extramural + Type of award: R, T, K, U or Other	10+ years	No	Hypothesis Testing	5	7
958	Specimen and Data Request	Fulfilled	2	Successful Search	2011-08-26	2011-09-29	2011-12-19	2012-01-30	157	34	81	42	Yes	40	40																								ACCESS	Yes	No	open	Yes	NIH Extramural + Type of award: R, T, K, U or Other	10+ years	No	Assay Validation	0
972	Specimen Request	Fulfilled	2	Successful Search	2011-09-08	2011-10-11	2011-11-10	2011-11-29	82	33	30	19	No	1947								1947																	HHP	Yes	Yes	open	Yes	NIH Extramural + Type of award: R, T, K, U or Other	5-10 years	No	Hypothesis Testing	1	7
994	Specimen and Data Request	Fulfilled	2	Successful Search	2011-09-24	2011-10-25	2012-06-25	2012-07-25	305	31	244	30	Yes	108									108																HEIRS	Yes	No	open	Yes	Institutional/Departmental	10+ years	No	Hypothesis Testing	0
995	Specimen and Data Request	Fulfilled	2	Successful Search	2011-09-27	2012-04-17	2012-05-03	2012-05-14	230	203	16	11	No	4								4																	HEIRS	Yes	Yes	open	Yes	NIH Extramural + Type of award: R, T, K, U or Other	10+ years	No	Hypothesis Generating	1	2
998	Specimen and Data Request	Closed - request not funded	2	Successful Search	2011-09-29	2011-10-10				11																													OMNI Heart	Yes	Yes	open	No	NIH Extramural + Type of award: R, T, K, U or Other		No		0
1019	Specimen and Data Request	Fulfilled	3	Successful Search	2011-10-16	2012-03-01	2012-04-17	2013-04-29	561	137	47	377	Yes	746																							746		DASH-Sodium	Yes	No	open	Yes	Private Foundation	10+ years	No	Hypothesis Testing	1	5
1071	Specimen Request	Closed - materials not available	3	No Search	2011-11-21																																		CBB	Yes	No	open		NIH Extramural + Type of award: R, T, K, U or Other		Yes		0
1077	Specimen Request	Closed - inactivity	3	Successful Search	2011-11-28	2012-01-27				60																													MHCS	Yes	No	open		NIH Intramural Research	10+ years	No		0
1089	Specimen and Data Request	Fulfilled	3	Successful Search	2011-12-02	2011-12-19	2012-01-17	2012-02-06	66	17	29	20	No	30																		30							REDS-GSR/GLPR	Yes	No	open	No	State Funding	10+ years	No	Assay Validation	0
1119	Specimen and Data Request	Fulfilled	3	Successful Search	2011-12-21	2012-04-09	2012-04-17	2012-11-13	328	110	8	210	No	22017	23													211	10			11092	1		1	54		10625	BMT CTN-0101	Yes	Yes	open	Yes	NIH Extramural + Type of award: R, T, K, U or Other	5-10 years	No	Assay Validation	0
1120	Specimen and Data Request	Fulfilled	3	Successful Search	2011-12-22	2012-04-06	2013-07-22	2013-07-30	586	106	472	8	No	889																		889							BMT CTN-0101	Yes	No	open	No	RFA-HL-12-004	5-10 years	Yes	Assay Validation	0
1121	Specimen Request	Fulfilled	3	Successful Search	2011-12-22	2012-08-07	2012-08-07	2012-09-17	270	229	0	41	No	713														713											BMT CTN-0101	Yes	Yes	open	Yes	Institutional/Departmental	5-10 years	No	Hypothesis Testing	0
1143	Specimen Request	Fulfilled	3	Successful Search	2012-01-12	2012-01-31	2013-07-19	2013-08-05	571	19	535	17	No	73														73											MHCS	Yes	No	open	No	RFA-HL-12-004	5-10 years	Yes	Assay Validation	1
1161	Specimen and Data Request	Fulfilled	3	Successful Search	2012-01-20	2012-01-30	2012-03-12	2012-08-05	198	10	42	146	Yes	1209														1209											PEACE	Yes	No	open	Yes	Private Foundation	10+ years	No	Hypothesis Testing	1	3
1186	Specimen and Data Request	Fulfilled	3	Successful Search	2012-02-01	2012-03-15	2013-07-22	2013-08-19	565	43	494	28	Yes	1678																		1678							NGHS	Yes	No	open	No	RFA-HL-12-004	0-5 years	Yes	Hypothesis Testing	0
1206	Specimen Request	Closed - inactivity	3	No Search	2012-02-07																																		REDS-RADAR	Yes	No	open		Industry		No		0
1216	Specimen Request	Fulfilled	3	Successful Search	2012-02-13	2012-03-13	2012-05-16	2012-07-30	168	29	64	75	Yes	975								772					203												MHCS	Yes	No	open	Yes	NIH Intramural Research	10+ years	No	Hypothesis Generating	0
1220	Specimen and Data Request	Closed - cancelled by user - other reason / NOS	3	Successful Search	2012-02-14	2012-03-27				42																													TRAP	Yes	No	open		NIH Extramural + Type of award: R, T, K, U or Other	5-10 years	Yes		0
1241	Specimen Request	Closed - request not funded	3	Successful Search	2012-02-21	2012-03-05				13																													CBB	Yes	No	open	No	RFA-HL-12-004	10+ years	Yes		0
1250	Specimen Request	Closed - materials not available	3	No Search	2012-02-24																																		REDS-GSR/GLPR	Yes	No	open		RFA-HL-12-004		Yes		0
1260	Specimen and Data Request	Closed - inactivity	3	Successful Search	2012-03-01	2012-03-15				14																													DASH-Sodium	Yes	No	open	Yes	NIH Intramural Research	10+ years	No		0
1267	Specimen and Data Request	Fulfilled	3	Successful Search	2012-03-05	2012-03-19	2013-07-22	2013-08-28	541	14	490	37	Yes	855														855											ARDSNet-FACTT	Yes	No	open	No	RFA-HL-12-004	10+ years	Yes	Hypothesis Testing	4	5
1269	Specimen Request	Closed - denied	3	No Search	2012-03-05																																		REDS-RADAR; REDS-GSR/GLPR	Yes	No	open		Pending	0-5 years	Yes		0
1276	Specimen Request	Closed - denied	3	Successful Search	2012-03-07	2012-03-29				22																													MHCS	Yes	No	open		RFA-HL-12-004		Yes		0
1283	Specimen and Data Request	Closed - request not funded	3	Successful Search	2012-03-09	2012-04-06				28																													ACCESS	Yes	No	open	No	RFA-HL-12-004		Yes		0
1292	Specimen and Data Request	Fulfilled	3	Successful Search	2012-03-14	2012-03-22	2012-06-20	2012-07-08	116	8	90	18	Yes	108								108																	MSH	Yes	No	open	Yes	Funding Outside of the United States	0-5 years	No	Hypothesis Generating	2	9
1293	Specimen and Data Request	Fulfilled	3	Successful Search	2012-03-14	2012-03-29	2013-07-22	2013-07-23	496	15	480	1	Yes	1393								1393																	ACCESS	Yes	No	open	No	RFA-HL-12-004	5-10 years	Yes	Hypothesis Testing	2	7
1294	Specimen and Data Request	Closed - request not funded	3	Successful Search	2012-03-14	2012-04-04				21																													PEACE	Yes	No	open	No	RFA-HL-12-004	10+ years	Yes		0
1297	Specimen Request	Closed - inactivity	3	No Search	2012-03-15																																		generic	Yes	No	open		Pending		Yes		0
1298	Specimen and Data Request	Closed - request not funded	3	Successful Search	2012-03-15	2012-04-09				25																													ACCESS	Yes	No	open	No	RFA-HL-12-004	0-5 years	Yes		0
1308	Specimen Request	Closed - request not funded	3	Successful Search	2012-03-18	2012-03-29				11																													REDS-GSR/GLPR	Yes	No	open	No	RFA-HL-12-004	10+ years	Yes		0
1313	Specimen and Data Request	Fulfilled	3	Successful Search	2012-03-20	2012-04-26	2013-07-22	2013-07-23	490	37	452	1	Yes	956								520						436											HHP	Yes	No	open	No	RFA-HL-12-004	10+ years	Yes	Hypothesis Generating	6	9
1314	Specimen and Data Request	Closed - request not funded	3	Successful Search	2012-03-21	2012-04-10				20																													REDS II-LAPS	Yes	Yes	open	No	RFA-HL-12-004	0-5 years	Yes		0
1329	Specimen Request	Closed - request not funded	3	Successful Search	2012-03-25	2012-04-03				9																													OMNI Heart	Yes	No	open	No	RFA-HL-12-004	10+ years	Yes		0
1334	Specimen and Data Request	Closed - materials not available	3	Unsuccessful Search	2012-03-27																																		NGHS	Yes	No	open		RFA-HL-12-004		Yes		0
1337	Specimen and Data Request	Closed - materials not available	3	Unsuccessful Search	2012-03-28																																		ARDSNet-LASRS	Yes	No	open		RFA-HL-12-004		Yes		0
1345	Specimen and Data Request	Fulfilled	3	Successful Search	2012-04-02	2012-04-23	2012-10-05	2012-11-12	224	21	165	38	Yes	171																		171							CSSCD	Yes	No	open	Yes	Funding Outside of the United States	0-5 years	No	Hypothesis Generating	2	9
1350	Specimen and Data Request	Closed - request not funded	3	Successful Search	2012-04-04	2012-04-11				7																													ARDSNet-LASRS	Yes	No	open	No	RFA-HL-12-004	10+ years	Yes		0
1353	Specimen Request	Fulfilled	3	Successful Search	2012-04-04	2012-04-09	2013-07-19	2013-08-05	488	5	466	17	No	26							26																		CBB	Yes	No	open	No	RFA-HL-12-004	10+ years	Yes	Assay Validation	2
1354	Specimen and Data Request	Closed - materials not available	3	No Search	2012-04-04																																		ARDSNet-FACTT	Yes	No	open		RFA-HL-12-004		Yes		0
1358	Specimen Request	Closed - request not funded	3	Successful Search	2012-04-06	2012-04-17				11																													HEIRS	Yes	No	open	No	RFA-HL-12-004		Yes		0
1363	Specimen and Data Request	Closed - request not funded	3	Successful Search	2012-04-08	2012-04-30				22																													ARDSNet-FACTT; REDS-GSR/GLPR; TIMI II; TRAP	Yes	No	open	No	RFA-HL-12-004		Yes		0
1364	Specimen and Data Request	Closed - materials not available	3	No Search	2012-04-08																																		BMT CTN-0101	Yes	No	open		RFA-HL-12-004	5-10 years	Yes		0
1372	Specimen and Data Request	Closed - request not funded	3	Successful Search	2012-04-09	2012-04-17				8																													ARDSNet-ARMA/KARMA/LARMA; ARDSNet-ALVEOLI; ARDSNet-FACTT	Yes	No	open	No	RFA-HL-12-004		Yes		0
1373	Specimen and Data Request	Closed - request not funded	3	Successful Search	2012-04-09	2012-04-20				11																													TIMI II	Yes	No	open	No	RFA-HL-12-004	10+ years	Yes		0
1377	Specimen Request	Closed - request not funded	3	Successful Search	2012-04-10	2012-04-26				16																													CBB	Yes	No	open	No	RFA-HL-12-004	10+ years	Yes		0
1378	Specimen and Data Request	Closed - request not funded	3	Successful Search	2012-04-10	2012-04-20				10																													ACCESS; ARDSNet-LASRS	Yes	No	open	No	RFA-HL-12-004	10+ years	Yes		0
1387	Specimen and Data Request	Fulfilled	3	Successful Search	2012-04-16	2012-04-23	2013-07-22	2013-07-23	463	7	455	1	Yes	136	136																								ARDSNet-LASRS	Yes	No	open	No	RFA-HL-12-004	5-10 years	Yes	Hypothesis Generating	0
1388	Specimen Request	Fulfilled	3	Successful Search	2012-04-16	2012-04-16	2012-04-17	2012-05-30	44	0	1	43	Yes	228								228																	REDS II-LAPS	Yes	Yes	open	Yes	NIH Extramural + Type of award: R, T, K, U or Other	10+ years	No	Hypothesis Generating	0
1390	Specimen and Data Request	Closed - materials not available	3	No Search	2012-04-17																																		IPPB	Yes	No	open		NIH Extramural + Type of award: R, T, K, U or Other		No		0
1391	Specimen and Data Request	Closed - inactivity	3	No Search	2012-04-17																																		REDS-GSR/GLPR	Yes	No	open	Yes	NIH Extramural + Type of award: R, T, K, U or Other		No		0
1393	Specimen and Data Request	Closed - request requirements	3	Successful Search	2012-04-19	2012-04-25				6																													OMNI Heart	Yes	No	open	No	RFA-HL-12-004		Yes		0
1394	Specimen and Data Request	Closed - request not funded	3	Successful Search	2012-04-19	2012-05-01				12																													REDS-GSR/GLPR	Yes	No	open	No	RFA-HL-12-004	5-10 years	Yes		0
1396	Specimen and Data Request	Fulfilled	3	Successful Search	2012-04-20	2012-05-02	2012-06-20	2012-07-25	96	12	49	35	Yes	57																		57							DASH	Yes	No	open	Yes	NIH Extramural + Type of award: R, T, K, U or Other	10+ years	No	Assay Validation	0
1400	Specimen and Data Request	Closed - request not funded	3	Successful Search	2012-04-23	2012-04-24				1																													HEIRS	Yes	Yes	open	No	RFA-HL-12-004	10+ years	Yes		0
1402	Specimen and Data Request	Closed - request not funded	3	Successful Search	2012-04-24	2012-04-26				2																													ARDSNet-ARMA/KARMA/LARMA; ARDSNet-FACTT	Yes	No	open	No	RFA-HL-12-004		Yes		0
1408	Specimen and Data Request	Closed - request not funded	3	Successful Search	2012-04-27	2012-05-01				4																													TIMI II	Yes	No	open	No	RFA-HL-12-004	5-10 years	Yes		0
1413	Specimen Request	Closed - request not funded	3	Successful Search	2012-04-30	2012-05-02				2																													HEIRS; REDS-GSR/GLPR; TSS	Yes	No	open	No	RFA-HL-12-004	10+ years	Yes		0
1415	Specimen and Data Request	Closed - request not funded	3	Successful Search	2012-04-30	2012-05-02				2																													HEIRS	Yes	No	open	No	RFA-HL-12-004	10+ years	Yes		0
1419	Specimen and Data Request	Fulfilled	3	Successful Search	2012-05-03	2012-05-15	2012-07-04	2012-08-28	117	12	50	55	Yes	146	146																								ARDSNet-LASRS	Yes	No	open	Yes	NIH Extramural + Type of award: R, T, K, U or Other	10+ years	No	Hypothesis Testing	0
1427	Specimen Request	Fulfilled	3	Successful Search	2012-05-09	2012-05-22	2012-06-18	2012-07-08	60	13	27	20	No	150							150																		CBB	Yes	No	open	Yes	Private Foundation	5-10 years	No	Hypothesis Testing	0
1449	Specimen and Data Request	Fulfilled	3	Successful Search	2012-06-05	2012-06-12	2012-06-21	2012-06-27	22	7	9	6	No	6								6																	HEIRS	Yes	Yes	open	Yes	NIH Extramural + Type of award: R, T, K, U or Other	10+ years	No	Hypothesis Generating	2	2
1477	Specimen Request	Closed - cancelled by user - other reason / NOS	3	Unsuccessful Search	2012-06-25																																		REDS-RADAR; REDS-SR; REDS II-RISE; REDS II-LAPS	Yes	No	open	Yes	RFA-HL-12-004		Yes		0
1483	Specimen and Data Request	Closed - request not funded	3	Successful Search	2012-06-29	2012-08-01				33																													VATS	Yes	No	open	No	RFA-HL-12-004		Yes		0
1490	Specimen and Data Request	Closed - request requirements	3	Unsuccessful Search	2012-07-03																																		OMNI Heart	Yes	No	open	Yes	NIH Extramural + Type of award: R, T, K, U or Other		No		0
1521	Specimen and Data Request	Fulfilled	3	Successful Search	2012-07-30	2012-09-07	2012-09-26	2012-10-15	77	39	19	19	No	54																		54							OMNI Heart	Yes	No	open	Yes	NIH Extramural + Type of award: R, T, K, U or Other	10+ years	No	Assay Validation	0
1528	Specimen Request	Fulfilled	3	Successful Search	2012-08-07	2012-08-07	2012-08-11	2012-09-05	29	0	4	25	No	262														262											VATS	Yes	Yes	open	Yes	NIH Extramural + Type of award: R, T, K, U or Other	10+ years	No	Hypothesis Testing	0
1533	Specimen Request	Closed - materials not available	3	Unsuccessful Search	2012-08-09																																		MHCS	Yes	No	open		RFA-HL-12-004		Yes		0
1538	Specimen and Data Request	Closed - cancelled by user - other reason / NOS	3	Unsuccessful Search	2012-08-14																																		NGHS	Yes	No	open		Pending		No		0
1554	Specimen Request	Closed - request requirements	3	No Search	2012-08-27																																		REDS-RADAR; REDS-GSR/GLPR	Yes	No	open	Yes	Institutional/Departmental	0-5 years	No		0
1555	Specimen Request	Closed - request requirements	3	No Search	2012-08-28																																		ACCESS	Yes	No	open	No	RFA-HL-12-004		Yes		0
1572	Specimen Request	Closed - inactivity	3	Successful Search	2012-09-06	2012-10-16				40																													TTVS	Yes	No	open		Non-NIH Federal Funding		No		0
1597	Specimen and Data Request	Closed - request not funded	3	Successful Search	2012-09-17	2012-10-09				22																													MSH	Yes	No	open	No	Institutional/Departmental	10+ years	No		0
1619	Specimen and Data Request	Closed - request not funded	3	Successful Search	2012-09-29	2012-10-17				18																													REDS-GSR/GLPR; WLM	Yes	No	open	No	Pending	10+ years	No		0
1688	Specimen Request	Fulfilled	4	Successful Search	2012-11-01	2012-12-06	2013-03-18	2013-05-20	200	35	102	63	No	10							10																		CBB	Yes	No	open	Yes	NIH Extramural + Type of award: R, T, K, U or Other	10+ years	No	Hypothesis Testing	0
1700	Specimen Request	Closed - cancelled by user - other reason / NOS	4	Unsuccessful Search	2012-11-13																																		REDS-SR	Yes	No	open		Industry		No		0
1708	Specimen and Data Request	Fulfilled	4	Successful Search	2012-11-20	2012-12-05	2013-01-26	2013-03-11	111	15	52	44	Yes	41														41											ARDSNet-FACTT	Yes	No	open	Yes	Institutional/Departmental	5-10 years	No	Hypothesis Testing	0
1717	Specimen and Data Request	Closed - inactivity	4	Successful Search	2012-11-27	2012-12-19				22																													PACS	Yes	No	open	No	NIH Extramural + Type of award: R, T, K, U or Other		No		0
1724	Specimen and Data Request	Closed - inactivity	4	Successful Search	2012-12-05	2012-12-12				7																													WLM	Yes	No	open		NIH Extramural + Type of award: R, T, K, U or Other		No		0
1731	Specimen and Data Request	Closed - materials not available	4	Unsuccessful Search	2012-12-12																																		generic	Yes	No	open		NIH Intramural Research		No		0
1752	Specimen and Data Request	Fulfilled	4	Successful Search	2013-01-10	2013-01-24	2013-02-19	2013-04-23	103	14	26	63	Yes	138																		138							TRAP	Yes	No	open	Yes	NIH Extramural + Type of award: R, T, K, U or Other	5-10 years	No	Hypothesis Testing	2	11
1761	Specimen Request	Closed - inactivity	4	Unsuccessful Search	2013-01-15																																		CBB	Yes	No	open	Yes	NIH Extramural + Type of award: R, T, K, U or Other		No		0
1786	Specimen Request	Fulfilled	4	Successful Search	2013-02-01	2013-02-12	2014-02-22	2014-04-14	437	11	375	51	Yes	3387														3387											REDS-RADAR	Yes	No	open	No	NIH Extramural + Type of award: R, T, K, U or Other	10+ years	No	Hypothesis Generating	0
1834	Specimen and Data Request	Closed - denied	4	Successful Search	2013-03-10	2013-04-17				38																													ACCESS; ARDSNet-LASRS; ARDSNet-FACTT	Yes	No	open		Other, specify		No		0
1858	Specimen and Data Request	Fulfilled	4	Successful Search	2013-03-21	2013-04-03	2013-05-14	2013-06-27	98	13	41	44	Yes	1517								1517																	ACCESS	Yes	No	open	Yes	NIH Extramural + Type of award: R, T, K, U or Other	5-10 years	No	Hypothesis Generating	0
1860	Specimen Request	Closed - inactivity	4	Successful Search	2013-03-25	2013-04-18				24																													CBB	Yes	No	open		NIH Intramural Research	10+ years	No		0
1871	Specimen and Data Request	Closed - materials not available	4	Unsuccessful Search	2013-04-08																																		MHCS	Yes	No	open		Institutional/Departmental		No		0
1888	Specimen and Data Request	Fulfilled	4	Successful Search	2013-04-22	2014-01-09	2014-06-03	2014-07-17	451	262	145	44	Yes	240														240											DASH-Sodium	Yes	No	open	No	NIH Intramural Research	10+ years	No	Hypothesis Testing	0
1910	Specimen and Data Request	Fulfilled	4	Successful Search	2013-05-01	2013-05-02	2013-09-19	2013-10-29	181	1	140	40	No	730																		730							TIMI II	Yes	No	open	No	NIH Extramural + Type of award: R, T, K, U or Other	10+ years	No	Hypothesis Testing	0
1921	Specimen and Data Request	Fulfilled	4	Successful Search	2013-05-14	2013-05-23	2014-08-05	2014-10-13	517	9	439	69	Yes	1754																		1754							MHCS; TTVS	Yes	No	open	No	NIH Extramural + Type of award: R, T, K, U or Other	10+ years	No	Hypothesis Generating	1
1922	Specimen Request	Closed - request not funded	4	Successful Search	2013-05-15	2013-05-17				2																													MHCS	Yes	Yes	open	No	NIH Extramural + Type of award: R, T, K, U or Other	10+ years	No		0
1987	Specimen and Data Request	Closed - inactivity	4	Successful Search	2013-07-26	2013-09-23				59																													CSSCD; MSH	Yes	No	open	No	NIH Extramural + Type of award: R, T, K, U or Other	10+ years	No		0
1993	Specimen and Data Request	Fulfilled	4	Successful Search	2013-07-30	2013-09-04	2013-09-26	2013-11-25	118	36	22	60	No	93														93											MHCS	Yes	No	open	Yes	Private Foundation	10+ years	No	Assay Validation	1
1995	Specimen and Data Request	Fulfilled	4	Successful Search	2013-07-30	2013-08-12	2013-10-24	2013-11-25	118	13	73	32	Yes	66														66											ARDSNet-ALTA; ARDSNet-FACTT	Yes	No	open	Yes	Institutional/Departmental	10+ years	No	Hypothesis Generating	0
2017	Specimen Request	Closed - inactivity	4	Successful Search	2013-08-13	2013-11-12				91																													VATS	Yes	No	open		Industry		Yes		0
2041	Specimen and Data Request	Fulfilled	4	Successful Search	2013-08-28	2013-09-03	2013-09-09	2013-09-19	22	6	6	10	Yes	862	64													798											ACCESS	Yes	No	open	Yes	NIH Extramural + Type of award: R, T, K, U or Other	10+ years	No	Hypothesis Generating	0
2057	Specimen Request	Fulfilled	4	Successful Search	2013-09-09	2013-09-25	2013-10-24	2014-01-14	127	16	29	82	Yes	133	133																								ARDSNet-ALTA	Yes	No	open	Yes	NIH Extramural + Type of award: R, T, K, U or Other	0-5 years	No	Hypothesis Testing	0
2088	Specimen Request	Closed - materials not available	4	Unsuccessful Search	2013-09-30																																		CBB	Yes	No	open	Yes	NIH Extramural + Type of award: R, T, K, U or Other		No		0
2144	Specimen Request	Closed - materials not available	5	Unsuccessful Search	2013-11-12																																		ACCESS	Yes	Yes	open		NIH Intramural Research	10+ years	No		0
2166	Specimen and Data Request	Fulfilled	5	Successful Search	2013-11-27	2013-12-03	2015-05-19	2015-08-04	615	6	532	77	Yes	1615														1357				258							REDS II-LAPS; TRAP	Yes	No	open	No	NIH Extramural + Type of award: R, T, K, U or Other	10+ years	No	Hypothesis Testing	0
2200	Specimen Request	Fulfilled	5	Successful Search	2014-01-03	2014-01-03	2015-01-28	2015-03-11	432	0	390	42	Yes	5743														5743											MHCS	Yes	Yes	open	No	NIH Extramural + Type of award: R, T, K, U or Other	10+ years	No	Hypothesis Testing	0
2226	Specimen Request	Fulfilled	5	Successful Search	2014-01-22	2014-07-29	2014-10-01	2014-12-17	329	188	64	77	Yes	2365																		2365							TTVS	Yes	No	open	Yes	NIH Extramural + Type of award: R, T, K, U or Other	10+ years	No	Hypothesis Generating	0
2227	Specimen Request	Fulfilled	5	Successful Search	2014-01-23	2014-01-29	2014-02-05	2014-05-06	103	6	7	90	No	150							150																		CBB	Yes	No	open	Yes	Institutional/Departmental	10+ years	No	Hypothesis Testing	0
2258	Specimen Request	Closed - inactivity	5	Successful Search	2014-02-18	2014-03-06				16																													PREMIER	Yes	No	open		Pending		No		0
2380	Specimen Request	Closed - materials not available	5	Unsuccessful Search	2014-04-23																																		NGHS	Yes	No	open		Institutional/Departmental		No		0
2394	Specimen and Data Request	Closed - inactivity	5	Successful Search	2014-05-01	2014-07-17				77																													TRAP	Yes	No	open		Industry	5-10 years	No		0
2444	Specimen and Data Request	Fulfilled	5	Successful Search	2014-06-06	2014-07-08	2014-12-15	2015-01-12	220	32	160	28	No	334																							334		DASH-Sodium	Yes	No	open	Yes	Institutional/Departmental	5-10 years	No	Hypothesis Testing	0
2550	Specimen Request	Fulfilled	5	Successful Search	2014-07-15	2014-07-23	2014-07-29	2014-10-08	85	8	6	71	Yes	1430														1430											REDS-RADAR	Yes	No	open	Yes	NIH Extramural + Type of award: R, T, K, U or Other	0-5 years	No	Hypothesis Testing	0
2576	Specimen Request	Fulfilled	5	Successful Search	2014-08-11	2014-08-28	2014-11-07	2014-12-16	127	17	71	39	Yes	20														20											WNV	Yes	No	open	Yes	NIH Extramural + Type of award: R, T, K, U or Other	10+ years	No	Assay Validation	0
2577	Specimen Request	Closed - inactivity	5	Unsuccessful Search	2014-08-12																																		REDS-GSR/GLPR	Yes	No	open	Yes	Other, specify	10+ years	No		0
2586	Specimen Request	Closed - request not funded	5	Successful Search	2014-08-19	2014-09-22				34																													WNV	Yes	Yes	open	No	NIH Extramural + Type of award: R, T, K, U or Other	10+ years	No		0
2614	Specimen and Data Request	Fulfilled	5	Successful Search	2014-09-11	2014-10-03	2014-11-05	2014-11-18	68	22	33	13	Yes	236	102													134											ARDSNet-ALTA	Yes	No	open	No	Institutional/Departmental	10+ years	No	Hypothesis Testing	0
2653	Specimen Request	Fulfilled	6	Successful Search	2014-10-01	2014-11-03	2014-11-26	2015-01-26	117	33	23	61	No	15							15																		CBB	Yes	No	open	Yes	NIH Extramural + Type of award: R, T, K, U or Other	10+ years	No	Hypothesis Testing	0
2752	Specimen and Data Request	Closed - cancelled by user - other reason / NOS	6	Successful Search	2014-11-25	2014-12-31				36																													P2C2	Yes	Yes	open	No	Institutional/Departmental	10+ years	No		0
2773	Specimen Request	Fulfilled	6	Successful Search	2014-12-17	2015-02-13	2015-03-27	2015-06-01	166	58	42	66	Yes	3004																							3004		ARDSNet-SAILS	Yes	Yes	open	Yes	Institutional/Departmental	10+ years	No	Hypothesis Testing	0
2782	Specimen and Data Request	Fulfilled	6	Successful Search	2014-12-22	2015-01-08	2015-03-27	2015-06-03	163	17	78	68	Yes	720														720											ARDSNet-SAILS	Yes	No	open	Yes	Institutional/Departmental	10+ years	No	Hypothesis Testing	0
2783	Specimen and Data Request	Closed - inactivity	6	Successful Search	2014-12-23	2015-01-30				38																													ARDSNet-FACTT	Yes	No	open	Yes	NIH Extramural + Type of award: R, T, K, U or Other	10+ years	No		0
2800	Specimen Request	Fulfilled	6	Successful Search	2015-01-06	2015-01-29	2015-03-12	2015-05-05	119	23	42	54	No	150							150																		CBB	Yes	No	open	Yes	Institutional/Departmental	10+ years	No	Hypothesis Testing	0
2862	Specimen Request	Closed - inactivity	6	Successful Search	2015-01-16	2015-01-29				13																													CBB	Yes	Yes	open	Yes	NIH Intramural Research	10+ years	No		0
2874	Specimen Request	Fulfilled	6	Successful Search	2015-01-21	2015-02-26	2015-02-26	2015-05-18	117	36	0	81	Yes	1370														1370											REDS-RADAR	Yes	No	open	Yes	NIH Extramural + Type of award: R, T, K, U or Other	0-5 years	No	Hypothesis Testing	0
2916	Specimen and Data Request	Closed - inactivity	6	Successful Search	2015-02-11	2015-03-02				19																													ARDSNet-EDEN	Yes	No	open	Yes	NIH Extramural + Type of award: R, T, K, U or Other	10+ years	No		0
2927	Specimen Request	Fulfilled	6	Successful Search	2015-02-19	2015-04-01	2015-04-16	2015-06-17	118	41	15	62	Yes	2207				2039				168																	HEIRS	Yes	No	open	Yes	Non-NIH Federal Funding	10+ years	No	Hypothesis Testing	0
2945	Specimen Request	Closed - request not funded	6	Successful Search	2015-03-02	2015-04-03				32																													DASH-Sodium	Yes	No	open	No	NIH Extramural + Type of award: R, T, K, U or Other	10+ years	No		0
2958	Specimen and Data Request	Fulfilled	6	Successful Search	2015-03-08	2015-03-24	2015-05-05	2015-08-03	148	16	42	90	Yes	2633														2633											ARDSNet-ALVEOLI; ARDSNet-FACTT	Yes	No	open	Yes	Institutional/Departmental	5-10 years	No	Hypothesis Testing	0
2993	Specimen Request	Fulfilled	6	Successful Search	2015-03-27	2015-04-20	2015-04-30	2015-05-13	47	24	10	13	No	78													39	39											WNV	Yes	Yes	open	Yes	NIH Extramural + Type of award: R, T, K, U or Other	10+ years	No	Hypothesis Testing	0
3005	Specimen and Data Request	Closed - inactivity	6	Successful Search	2015-04-01	2015-06-02				62																													REDS-GSR/GLPR	Yes	Yes	open	No	Pending	0-5 years	No		0
3050	Specimen and Data Request	Fulfilled	6	Successful Search	2015-04-28	2016-03-17	2016-04-06	2016-05-24	392	324	20	48	Yes	138								134	4																HEIRS	Yes	Yes	open	Yes	NIH Extramural + Type of award: R, T, K, U or Other	10+ years	No	Hypothesis Testing	0
3056	Specimen and Data Request	Closed - request not funded	6	Successful Search	2015-05-01	2015-08-07				98																													PREMIER	Yes	No	open	No	Funding Outside of the United States	5-10 years	No		0
3076	Specimen Request	Closed - materials not available	6	No Search	2015-05-14																																		REDS-GSR/GLPR	Yes	No	open	Yes	Institutional/Departmental	0-5 years	No		0
3093	Specimen and Data Request	Fulfilled	6	Successful Search	2015-05-27	2015-06-15	2015-07-27	2015-09-14	110	19	42	49	Yes	129								129																	MSH	Yes	No	open	Yes	NIH Extramural + Type of award: R, T, K, U or Other	10+ years	No	Hypothesis Testing	0
3120	Specimen and Data Request	Fulfilled	6	Successful Search	2015-06-18	2015-07-13	2015-08-12	2015-09-01	75	25	30	20	Yes	160														80				80							WLM	Yes	No	open	Yes	NIH Extramural + Type of award: R, T, K, U or Other	10+ years	No	Hypothesis Testing	0
3285	Specimen Request	Fulfilled	6	Successful Search	2015-09-01	2015-09-16	2015-10-15	2015-10-21	50	15	29	6	No	20							20																		CBB	Yes	No	open	Yes	NIH Extramural + Type of award: R, T, K, U or Other	10+ years	No	Hypothesis Testing	0
3291	Specimen Request	Fulfilled	6	Successful Search	2015-09-04	2015-09-25	2015-10-06	2015-12-16	103	21	11	71	Yes	472																		472							TRAP	Yes	No	open	Yes	NIH Extramural + Type of award: R, T, K, U or Other	10+ years	No	Hypothesis Testing	0
3320	Specimen Request	Closed - request not funded	6	Successful Search	2015-09-21	2015-10-01				10																													WNV	Yes	Yes	open	No	NIH Extramural + Type of award: R, T, K, U or Other	10+ years	No		0
3329	Specimen Request	Closed - request requirements	6	No Search	2015-09-25																																		CBB	Yes	Yes	open	No	NIH Intramural Research	10+ years	No		0

## Sheet: Data - Website User Metrics
	User Metrics
Website Year	New Active Users	New Unique IPs	Cumulative Unique IPs	Unique Sessions
10/1/2009 - 9/30/2010	479	14689	14689	26379
10/1/2010 - 9/30/2011	556	16219	30908	39345
10/1/2011 - 9/30/2012	632	19709	50617	57705
10/1/2012 - 9/30/2013	668	24049	74666	65561
10/1/2013 - 9/30/2014	724	18790	93456	50208
10/1/2014 - 9/30/2015	879	21841	115297	89662

## Sheet: Data - Study Utilization
	Study Information (as of 9/30/2015)			Usage	All BioLINCC Website Requests					BioLINCC Website Availability (as of 9/30/2015)
Study	Current Period	NHLBI Division	# of Years Open on BioLINCC	Usage Since Website Launch	# of Inquiries	Successful Searches	# of Requests Fulfilled	# of Specimens Shipped	Total Available Vials	Serum	Plasma	DNA	Whole Blood	Urine	Buffy Coat	RBC	BAL	PBMC	Other	Other Material Types
ACCESS	Open	DLD	6	0.112956	14	10	6	5544	43537		13489	27931					662	1455
COBLT-Bank	Open	DBDR	6	0.370427	25	20	15	1205	2048										2048	CBU
GSR/GLPR	Open	DBDR	6	0.00940469	20	12	3	9030	951129	526355	142962		281812
HEIRS	Open	DCVS	6	0.0114968	14	14	10	4262	366451	169954	4591	23992			159928				7986	Lymphocytes
HHV8	Open	DBDR	6	0	0	0	0	0	11270		6473		4797
PEACE	Open	DCVS	6	0.0936848	6	5	4	7947	76880	21019	41723			14138
RADAR	Open	DBDR	6	0.0132818	7	3	3	6187	459639	1093	322726		135820
TTVS	Open	DBDR	6	0.0283277	7	6	5	6850	234963	234963
MSH	Open	DBDR	5.5	0.124686	6	5	3	347	2436	1404		879			153
ALVEOLI	Open	DLD	5.5	0.0552256	7	5	1	995	17022		17022
FACTT	Open	DLD	5.5	0.21917	18	15	9	8767	31234	146	31088
ARMA/KARMA/LARMA	Open	DLD	5.5	0	6	4	0	0	10120	1201	5590			3329
LaSRS	Open	DLD	5.5	0.0653989	12	9	2	282	4030		235						3317		478	Leukocytes
SR	Open	DBDR	5.4	0.00183483	3	1	1	301	163747	3005	81796		61569					16088	1289	Platelets
NGHS	Open	DCVS	5.4	0.0698439	7	1	1	1678	22347	22347
TRAP	Open	DBDR	5.4	0.0320696	8	7	4	1987	59972	59972
VATS	Open	DBDR	5.1	0.0168417	4	4	2	1132	66082	14124	16244		24532			10957			225	Platelets
HHP	Open	DCVS	5	0.0488968	7	7	3	4820	93755	46541	32037	15177
MHCS	Open	DBDR	5	0.0278315	18	14	10	9519	332504	25842	202464	10679				7713		85806
TSS	Open	DBDR	5	0.000550306	3	3	1	192	348705	216350	36193				52532				43630	"Plasma or Serum"
DASH-Sodium	Open	DCVS	5	0.148726	8	8	5	3240	18545	7799	5589			5157
PREMIER	Open	DCVS	5	0.0928793	4	3	1	4277	41772	15078	6282			19621	791
DASH	Open	DCVS	4.8	0.079963	3	2	2	1297	14923	4252	1341			9330
CSSCD	Open	DBDR	4.6	0.0812738	5	2	1	171	1933	1312		621
P2C2	Open	DLD	4.3	0.0459277	2	2	1	353	7333	7333
OMNI Heart	Open	DCVS	4.2	0.120056	8	6	3	1703	12482	7208	4645			629
WLM	Open	DCVS	4.2	0.00456764	4	3	1	160	34869	22782	10573				1514
LAPS	Open	DBDR	4.1	0.0498868	6	6	5	3172	60412	20826	26285	545				12756
RISE	Open	DBDR	4.1	0.0351507	3	2	2	1009	27696		22399	622				4675
TIMI II	Open	DCVS	3.9	0.0260807	4	4	1	730	27260	27260
NANB	Open	DBDR	3.6	0	0	0	0	0	3691	3691
PACTG	Open	DBDR	3.3	0	0	0	0	0	73591		49395								24196	Isolates and Cells
PACS	Open	DLD	3.2	0	1	1	0	0	54634	54634
DISC	Open	DCVS	3.1	0	0	0	0	0	18252	18252
REDS-MS	Open	DBDR	2.9	0	0	0	0	0	26311	131	26180
VA2	Open	DBDR	2.3	0	0	0	0	0	20128	20128
ALTA	Open	DLD	2.1	0.200634	7	6	6	1710	6813		4471			1678			664
WNV	Open	DBDR	1.4	0.00803674	4	4	2	98	12096		5770		342			627		5357
EDEN	Open	DLD	1	0	2	1	0	0	12774		6936			5837			1
Omega	Open	DLD	1	0.335915	3	3	3	2299	4545		3330			1212			3
SAILS	Open	DLD	0.8	0.276466	3	3	3	5526	14462		7810			6652
Total				0.024887				96790	3792393	1555002	1135639	80446	508872	67583	214918	36728	4647	108706	79852
